# Supplementary material for: Understanding Heterosis, Genetic Effects, and Genome Wide Associations for Forage Quantity and Quality Traits in Multi-Cut Pearl Millet
Source: Front Plant Sci. 2021 Nov 18;12:687859. doi: 10.3389/fpls.2021.687859 (PMC8636684; doi:10.3389/fpls.2021.687859)
Supplement: Supplementary file 6 [file Table_5.XLSX]

## Sheet: Supplementary Table 5
Supplementary Table 5. Better parent heterosis (BPH) for forage linked traits of single cross hybrids for both the cuts, evaluated at ICRISAT, Patancheru and TNAU, Coimbatore, during summer season of 2015.
S.No.	Cross combinations	Desirable forage traits														Undesirable forage traits
		PH (cm)		GFY (t ha-1)		TGFY (t ha-1)	DFY (t ha-1)		TDFY (t ha-1)	CP (%)		ME (MJ kg-1)		IVOMD (%)		NDF (%)		ADF (%)		ADL (%)
		FC†	SC‡	FC	SC	Combined	FC	SC	Combined	FC	SC	FC	SC	FC	SC	FC	SC	FC	SC	FC	SC
1	SCH01:L01 × T11	NA	40.75**	10.27	36.41	23.77	104.25	40.59	22.03	-8.76	-21.27	2.27	-6.41	1.21	-6.89	2.08**	7.44**	-0.36	11.1**	2.43	13.43**
2	SCH02:L01 × T12	NA	NA	26.55	NA	33.79	238.21**	NA	18	-9.56	NA	5.77	NA	4.52	NA	0.99	NA	-3.27	NA	-2.61	NA
3	SCH03:L01 × T13	NA	NA	23.14	NA	59.49*	8.17	NA	110.21*	-19.77	NA	0.89	NA	-0.45	NA	8.76**	NA	4.11**	NA	11.29**	NA
4	SCH04:L01 × T14	NA	57.19**	16.39	297.81*	34.9	176.61*	203.39	192.52**	-11.75	-26.09*	-1.46	-7.58	-2.06	-10.84**	1.91**	6.75**	1.07	16.86**	8.74**	24.05**
5	SCH05:L01 × T15	NA	35.18*	35.89	78.78*	62.18**	254.41**	107.63	269.12**	8.84	-19.41	-0.29	-0.58	-1.04	-0.63	1.97**	4.42**	1.48*	9.19**	8.22**	5.02**
6	SCH06:L01 × T16	NA	28.05*	60.18*	-7.31	43.34	144.15*	-29.71	55.38	-14.26	-16.69	-0.14	-3.89	-1.59	-5.24	2.23**	5.38**	5.52**	5.79**	7.88**	8.77**
7	SCH07:L01 × T17	NA	53.12**	11.24	16.67	45.58	140.89	12.7	135.00**	-7.2	-10.87	0.57	-3.64	0.16	-3.15	0.59	6.39**	0.29	14.73**	4.24**	16.63**
8	SCH08:L01 × T18	NA	NA	26.27	NA	71.96**	300.00**	NA	306.95**	-14.51	NA	4.01	NA	3.58	NA	1.93**	NA	-0.46	NA	-0.01	NA
9	SCH09:L02 × T11	NA	28.2	41.44*	-18.12	52.64*	178.40**	5.88	95.51**	-14.68	-7.52	-0.99	-0.84	-2.74	-1.68	4.03**	1.45**	0.01	-2.7	8.28**	3.35**
10	SCH10:L02 × T12	NA	NA	27.33	NA	20.28	122.67	NA	27.06	-5.48	NA	5.43	NA	3.86	NA	2.01**	NA	-0.83	NA	-2	NA
11	SCH11:L02 × T13	NA	NA	74.38**	NA	100.69**	45.53	NA	75.46*	-4.52	NA	-0.29	NA	-0.95	NA	8.78**	NA	1.62*	NA	8.56**	NA
12	SCH12:L02 × T14	NA	44.14*	33.79	160.58	46.84*	238.86**	206.38	193.40**	-5.99	-18.67	7.73	-4.72	6.7	-2.76	2.14**	2.39**	-1.21	13.51**	-4.41	15.14**
13	SCH13:L02 × T15	NA	19.63	67.79**	-20.43	81.29**	201.80**	2.29	121.03**	-24.86*	4.48	5.26	2.92	2.37	3.13	3.09**	-0.08	-1.59	1.97	-1.38	-4.94
14	SCH14:L02 × T16	NA	36.41**	72.07*	23.58	72.15**	198.66**	10.86	101.38**	-17.57	-18.78	-3.6	-2.92	-4.9	-5.2	3.7**	3.16**	5.66**	4.54*	11.29**	13.98**
15	SCH15:L02 × T17	NA	38.83*	42.15*	129.06	101.04**	230.36**	138.1	101.07**	-9.6	-4	3.3	3.94	2.17	2.62	2.42**	3.4**	2.75**	2.18	4.31**	0.13
16	SCH16:L02 × T18	NA	NA	38.58	NA	65.01*	204.45**	NA	153.99**	-11.91	NA	4.25	NA	2.83	NA	0.27	NA	-9.77	NA	-12.82	NA
17	SCH17:L03 × T11	NA	33.50*	5.85	28.22	21.86	151.02*	55.88	128.36**	-14.32	-18.4	-0.43	1.25	-1.09	-0.41	3.63**	1.25**	1.52*	2.74	8.86**	-1.15
18	SCH18:L03 × T12	NA	NA	34.73	NA	51.18*	344.34**	NA	138.53**	-15.89	NA	5.68	NA	2.77	NA	-2.16	NA	-5.49	NA	-6.73	NA
19	SCH19:L03 × T13	NA	NA	47.41*	NA	95.15**	51.49	NA	270.13**	-13.72	NA	3.49	NA	0.71	NA	5.51**	NA	-4.48	NA	-1.96	NA
20	SCH20:L03 × T14	NA	43.46**	10.82	33.12	26	152.30*	37.4	124.52**	-15.37	-17.92	3.2	-3.72	0.67	-8.57*	-1.33	4.01**	-4.5	16.39**	0.03	21.88**
21	SCH21:L03 × T15	NA	22.87	38.97	48.53	61.67**	171.57**	68.7	96.03**	-15.14	-13.08	-2.04	-5.26	-3.93	1.26	1.7**	1.6**	1.14	8.99**	9.53**	12.78**
22	SCH22:L03 × T16	NA	45.33**	69.68*	31.81	72.72**	162.38*	49.71	189.24**	-19.41*	-11.38	2.16	-8.47*	-0.71	-8.55*	2.92**	5.71**	1.96*	9.96**	5.17**	19.36**
23	SCH23:L03 × T17	NA	44.31**	7.3	23.34	40.91	103.18	17.07	31.54	-7.57	-14.37	3.73	2.04	2.66	-0.14	0.48	7.97**	-2.82	9.95**	-1.39	11.03**
24	SCH24:L03 × T18	NA	NA	9.77	NA	32.93	142.44	NA	163.71**	-12.14	NA	1.02	NA	-0.83	NA	-0.69	NA	-6.76	NA	-0.72	NA
25	SCH25:L04 × T11	NA	NA	10.3	NA	12.75	118.88	NA	77.70**	-22.70*	NA	1.99	NA	-0.33	NA	2.77**	NA	-1.36	NA	3.17*	NA
26	SCH26:L04 × T12	NA	NA	39.29	NA	48.14*	329.72**	NA	121.44**	-23.70*	NA	-6.14	NA	-8.16	NA	2.18**	NA	10.08**	NA	20.06**	NA
27	SCH27:L04 × T13	NA	NA	6.4	NA	34	-13.06	NA	162.37**	-24.20**	NA	0.3	NA	-1.07	NA	9.96**	NA	4.27**	NA	9.99**	NA
28	SCH28:L04 × T14	NA	NA	20.77	NA	27.22	133.33	NA	139.30**	-20.50*	NA	-2.77	NA	-2.71	NA	4.25**	NA	5.3**	NA	8.87**	NA
29	SCH29:L04 × T15	NA	NA	19.05	NA	28.45	89.54	NA	100.88**	-16.16	NA	3.51	NA	2.35	NA	1.8**	NA	0.24	NA	-0.49	NA
30	SCH30:L04 × T16	NA	NA	38.58	NA	35.03	135.12	NA	164.55**	-13.17	NA	4.18	NA	2.59	NA	1.94**	NA	-0.89	NA	-0.7	NA
31	SCH31:L04 × T17	NA	NA	18.43	NA	72.39**	198.52*	NA	225.77**	-22.06*	NA	2.15	NA	0.2	NA	3.4**	NA	4.7**	NA	7.83**	NA
32	SCH32:L04 × T18	NA	NA	15.36	NA	47.72	255.04**	NA	185.91**	-12.67	NA	6.38	NA	5.99	NA	-1.88	NA	-2.04	NA	-4.27	NA
33	SCH33:L05 × T11	NA	39.89*	48.96*	12.02	45.22*	202.38**	38.82	94.46**	-20.14*	-8.61	-1.99	-5.12	-4.1	-4.92	7.3**	5**	6.08**	4.24*	16.22**	14.67**
34	SCH34:L05 × T12	NA	NA	57.30**	NA	54.47**	217.66**	NA	73.05**	-22.30*	NA	1	NA	-1.54	NA	4.67**	NA	2.98**	NA	10.53**	NA
35	SCH35:L05 × T13	NA	NA	58.83**	NA	40.02*	64.65	NA	189.22**	-12.23	NA	0	NA	-2.07	NA	8.26**	NA	5.78**	NA	13.58**	NA
36	SCH36:L05 × T14	NA	51.57**	47.92*	6.18	38.35*	104.05	6.96	103.75**	-16.71	-12.69	0.43	-6.23	-1.81	-7.74*	4.1**	4.73**	3.63**	15.3**	7.92**	18.23**
37	SCH37:L05 × T15	NA	36.47*	66.53**	-26.52	47.72*	128.92*	-20.61	47.35	-10.84	-18.25	-1.57	-5.82	-3.04	-6.17	3.69**	8.34**	4.96**	7.38**	12.45**	23.39**
38	SCH38:L05 × T16	NA	39.58**	42.84*	62.34	43.11*	168.40*	38.29	165.00**	-7.94	-10.54	4.84	-4.02	3.86	-4.93	-0.04	2.77**	-3.85	4.55*	-2.3	12.89**
39	SCH39:L05 × T17	NA	51.67**	22.69	93.55	21.74	78.07	74.78	109.69**	-5.5	-4.47	2.28	-7.89	0.94	-6.93	1.73**	8.22**	2.22**	17.41**	4.54**	22.05**
40	SCH40:L05 × T18	NA	NA	54.18*	NA	50.84**	219.14**	NA	74.84*	-10.79	NA	3.28	NA	1.05	NA	0.94	NA	1.9*	NA	5.36**	NA
41	SCH41:L06 × T11	NA	17.52	8.14	-4.18	28.43	178.74**	21.18	143.93**	-27.77**	-5.89	1.26	-1.53	-1.93	-2.14	6.49**	-0.94	6.91**	3.9	16.75**	2.85**
42	SCH42:L06 × T12	NA	NA	14.38	NA	26.5	278.89**	NA	100.34**	-21.61*	NA	5.44	NA	1.51	NA	4.74**	NA	-0.09	NA	3.52*	NA
43	SCH43:L06 × T13	NA	NA	52.93*	NA	92.47**	50.14	NA	223.08**	-24.97**	NA	0.42	NA	-2.76	NA	6.01**	NA	4.33**	NA	13.64**	NA
44	SCH44:L06 × T14	NA	68.71**	13.53	181.75	27.28	156.17*	159.09	164.52**	-20.25*	-10.65	0.42	-4.86	-1.99	-9.10*	4.74**	3.81**	4.42**	15.84**	11.69**	18.93**
45	SCH45:L06 × T15	NA	12.92	24.24	72.89*	45.24*	80.07	73.28	152.06**	-24.90**	-2.29	-0.42	3.5	-3.35	3.23	5.11**	1.32**	4.64**	4.14*	13.74**	4.96**
46	SCH46:L06 × T16	NA	13.28	41.76	25.96	38.83	95.97	26.86	118.87**	-10.4	-3.81	2.51	1.11	1.29	-0.15	4.21**	2.94**	1.96*	2.67	6.93**	2.36**
47	SCH47:L06 × T17	NA	52.01**	30.79	-17.95	78.32**	255.30**	25.4	138.65**	-18.74*	2.7	1.53	2.04	-0.89	1.31	5.04**	4.47**	3.84**	9.59**	9.68**	7.31**
48	SCH48:L06 × T18	NA	NA	7	NA	45.84	173.95*	NA	178.57**	-20.52*	NA	-0.56	NA	-2.84	NA	6.08**	NA	7.71**	NA	17.92**	NA
49	SCH49:L07 × T11	NA	26.58	-5.76	-26.48	1.77	64.63	5.29	61.08*	-13.9	-6.23	0.56	-1.39	-0.53	-2.01	3.83**	2.69**	3.1**	0.75	14.04**	7.69**
50	SCH50:L07 × T12	NA	NA	24.66	NA	32.96	207.08*	NA	63.99*	-24.32**	NA	-0.84	NA	-3.24	NA	7.07**	NA	6.79**	NA	18.96**	NA
51	SCH51:L07 × T13	NA	NA	54.32*	NA	89.51**	34.29	NA	247.20**	-21.10*	NA	0.84	NA	-1.31	NA	4.98**	NA	4.26**	NA	13.74**	NA
52	SCH52:L07 × T14	NA	70.45**	-8.19	92.33	12.31	99.26	42.53	118.43**	-7.95	-12.04	4.34	-4.15	3.14	-8.63*	2.06**	3.91**	-1.26	16.7**	1.5	19.97**
53	SCH53:L07 × T15	NA	29.30*	23.91	51.67	40.37	51.8	60.31	106.62**	-25.14**	-20.26	-0.7	0.73	-3.22	0.25	6.84**	5.08**	7.73**	5.48**	20.07**	7.4**
54	SCH54:L07 × T16	NA	3.97	43.51	5.3	43.3	59.5	29.14	101.76**	-12.81	0.35	0.28	-3.19	-0.72	-3.58	4.46**	3.37**	6.3**	5.76**	14.07**	11.14**
55	SCH55:L07 × T17	NA	38.36*	23.63	-37.04	70.20**	110.38	-12.64	106.73*	-22.67*	3.46	-1.4	-5.54	-3.43	3.43	5.85**	2.9**	4.15**	5.87**	14.24**	5.75**
56	SCH56:L07 × T18	NA	NA	28.77	NA	55.19*	238.66**	NA	260.62**	-26.23**	NA	-3.5	NA	-5.96	NA	7.32**	NA	11.47**	NA	28.65**	NA
57	SCH57:L08 × T11	NA	27	17.4	3.14	34.78	154.93*	-1.76	119.13**	-14.37	-14.18	1.7	0.97	-0.14	-0.25	3.57**	3.68**	-1.38	-1.56	4.33**	-3.07
58	SCH58:L08 × T12	NA	NA	23.16	NA	25.22	223.46**	NA	100.23**	-4.64	NA	3.87	NA	2.04	NA	1.76**	NA	-4.73	NA	-2.12	NA
59	SCH59:L08 × T13	NA	NA	35.31	NA	35.99	29.2	NA	168.65**	-5.78	NA	0.89	NA	-0.83	NA	9.05**	NA	-0.06	NA	7.77**	NA
60	SCH60:L08 × T14	NA	46.46*	13.79	-1.15	20.77	185.08**	2.53	190.26**	-4.47	-13.22	-1.17	2.43	-1.13	-2.35	0.77	2.24**	0.73	13.09**	5.89**	4.66**
61	SCH61:L08 × T15	NA	24.03	47.03*	-1.38	80.65**	234.64**	48.85	173.09**	-14.5	-21.15	2.05	1.75	0.86	1.75	0.76	6.16**	-0.73	6.11**	4.34**	10.86**
62	SCH62:L08 × T16	NA	45.16**	43.64	38.94	66.57**	174.28*	36	193.87**	-9.93	-11.38	4.03	-3.33	2.71	-4.3	1.37*	4.98**	2.88**	7.56**	2.97*	12.67**
63	SCH63:L08 × T17	NA	65.55**	43.06*	210.69**	87.89**	248.15**	159.49	156.39**	-9.68	-10.66	0.29	-3.35	-0.41	-1.63	1.34*	5.03**	4.21**	8.96**	10.54**	10.11**
64	SCH64:L08 × T18	NA	NA	10.64	NA	20.61	105.56	NA	130.30**	1.89	NA	1.04	NA	0.82	NA	0.25	NA	-3.49	NA	-0.66	NA
65	SCH65:L09 × T11	NA	19.66	28.79	-20.73	32.37	183.16**	-2.94	139.84**	-13.07	-21.78	-1.7	0.84	-4.06	-1	5.9**	3.38**	1.2	4.61*	12.7**	-0.56
66	SCH66:L09 × T12	NA	NA	36.47	NA	36.65	209.48**	NA	73.74**	-18.88	NA	-3.53	NA	-4.77	NA	1.98**	NA	-0.7	NA	8.47**	NA
67	SCH67:L09 × T13	NA	NA	36.71	NA	30.13	41.31	NA	155.02**	3.49	NA	5	NA	4.33	NA	3.11**	NA	-2.42	NA	-1.86	NA
68	SCH68:L09 × T14	NA	9.54	43.54*	101.86	44.37*	202.03**	4.29	192.09**	-2.53	-10.29	4.08	-0.86	3.78	-5.34	-1.64	4.88**	-3.2	16.63**	-1.2	16.02**
69	SCH69:L09 × T15	NA	18.41	52.79**	0.59	49.56*	103.92	6.87	67.94*	-9.08	-30.71**	1.61	-1.9	0.08	-2.8	-0.88	8.47**	-2.46	10.46**	2.33	14.32**
70	SCH70:L09 × T16	NA	38.54**	40.09*	39.67	48.09*	184.57**	26.29	189.13**	-17.94	-15.27	3.31	-0.42	0.8	-2.19	0.53	3.51**	0.65	4.72*	0.99	9.31**
71	SCH71:L09 × T17	NA	24.94	44.06*	128.63	44.11*	168.96*	34.29	106.92**	-8.68	-17.93	0.43	-3.79	-0.73	-4.48	3.46**	3.05**	4.69**	5.19*	8.2**	8.83**
72	SCH72:L09 × T18	NA	NA	30.35	NA	31.54	119.89	NA	32.45	-4.25	NA	1.18	NA	0.36	NA	-1.58	NA	-0.27	NA	3.53*	NA
73	SCH73:L10 × T11	NA	44.99**	20.57	30.14	27.97	67.35	32.94	13.32	-16.43	-12.62	1.28	-3.06	0.27	-3.4	3.01**	2.06**	2.6**	3.41	5.35**	8.8**
74	SCH74:L10 × T12	NA	NA	26.4	NA	28.23	162.5	NA	47.25	-23.20**	NA	7.28	NA	6.1	NA	3.78**	NA	0.63	NA	6.21**	NA
75	SCH75:L10 × T13	NA	NA	68.76**	NA	118.42**	63.3	NA	421.88**	-18.00*	NA	3.84	NA	2.57	NA	5.86**	NA	1.22	NA	5.14**	NA
76	SCH76:L10 × T14	NA	59.21**	36.51	301.86**	59.78**	147.70*	248.21	169.22**	-22.11*	-17.35	5.54	0	4.4	-5.41	3.04**	0.88*	-0.79	8.74**	-0.08	7.19**
77	SCH77:L10 × T15	NA	34.31*	25.9	-11.2	39.95	107.03	13.74	77.65*	-21.63*	-29.42*	4.24	-2.92	2.67	1.23	2.33**	-0.11	2.42**	1.18	6.49**	6.52**
78	SCH78:L10 × T16	NA	24.49	43.34	26.69	29.48	111.52	14.29	127.87**	-10.47	-11.04	4.47	-3.06	3.08	-3.9	0.47	4.46**	-4.9	1.81	-3.09	11.08**
79	SCH79:L10 × T17	NA	73.16**	17.77	116.67	56.90*	175.00*	161.9	178.85**	-19.03*	-17.11	2.3	1.02	1.01	0.89	2.27**	4.09**	2.4**	8.04**	6**	7.67**
80	SCH80:L10 × T18	NA	NA	44.34*	NA	86.96**	298.95**	NA	212.16**	-18.07*	NA	4.3	NA	4.78	NA	2.18**	NA	-0.05	NA	6.99**	NA
†FC:First cut; ‡SC: Second cut
*P<0.05, **P<0.01, NA: Not Available
Note: PH: Plant height; GFY: Green forage yield; TGFY: Total green forage yield; DFY:Dry forage yield; TDFY: Total dry forage yield; CP: Crude protein; NDF: Neutral detergent fibre; ADF: Acid detergent fibre; ADL: Acid detergent lignin; ME: Metabolizable energy; IVOMD: In vitro organic matter digestibility.
